# Supplementary material for: Modified photoanode by in situ growth of covalent organic frameworks on BiVO4 for oxygen evolution reaction
Source: Royal Society of Chemistry journal article supplement (doi:10.1039/d4ra00899e), 2024-01-01
Supplement: d4ra00899e1.pdf [file d4ra00899e1.pdf]

## Supporting Information for Modified Photoanode by In Situ Growth of Covalent Organic Frameworks on BiVO<sub>4</sub> for Oxygen Evolution Reaction

Anni Guo,<sup>‡,a</sup> Xingchun Wu,<sup>‡,a</sup> Syed Husnain Ali,<sup>a</sup> Huawei Shen,<sup>c</sup> Ligong Chen,<sup>\*,a,b</sup> Yang Li<sup>a,b</sup> and Bowei Wang<sup>\*,a,b</sup>

<sup>a</sup> School of Chemical Engineering and Technology, Tianjin University, Tianjin 300350, P. R. China

<sup>b</sup> Institute of Shaoxing, Tianjin University, Zhejiang 312300, P. R. China

<sup>c</sup> Shaoxing Xingxin New Materials Co., Ltd., Shaoxing 312300, Zhejiang, P. R. China

\* Corresponding author at: School of Chemical Engineering and Technology, Tianjin University, Tianjin 300350, P. R. China.

E-mail address: bwwang@tju.edu.cn (Bowe Wang, ORCID ID: 0000-0002-9400-0698); lgchen@tju.edu.cn (Ligong Chen, ORCID ID: 0000-0002-3442-5694)

<sup>‡</sup> These authors contributed equally to this work.

# Table of Contents

## Characterization

## Electrochemical and photoelectrochemical measurements

## Figures

**Scheme. S1** Monomers and structures diagram of COF-Azo and COF-Ben

**Fig. S1** (a) HRTEM image and (b) element mapping of BiVO<sub>4</sub>/COF-Azo; (c) HRTEM image and (d) element mapping of BiVO<sub>4</sub>/COF-Ben

**Fig. S2** XRD patterns of BiVO<sub>4</sub>, BiVO<sub>4</sub>/COF-Azo and BiVO<sub>4</sub>/COF-Ben

**Fig. S3** XRD patterns with experimental and simulated results of COF-Azo and COF-Ben

**Fig. S4** (a) FT-IR spectra of Tp, Azo, Ben, COF-Azo and COF-Ben; (b) FT-IR spectra of COF-Azo, COF-Ben, BiVO<sub>4</sub>, BiVO<sub>4</sub>/COF-Azo and BiVO<sub>4</sub>/COF-Ben

**Fig. S5** Stability test curve of BiVO<sub>4</sub>/COF-Azo photoanode

**Fig. S6** PXRD patterns for (a) COF-Azo and (b) COF-Ben before and after treatment with water (100 °C), HCl (1 M), and NaOH (1 M), respectively. (c) TGA curves of COF-Azo and COF-Ben, respectively.

## Characterization

The FT-IR spectra were obtained on a Nicolet 22 AVATAR 370 FT-IR spectrometer as a KBr pellet. X-ray powder diffraction analysis was performed on a Rigaku D/max 2500 X-ray diffractometer with Cu K $\alpha$  radiation. Scanning electron microscopy (SEM) images were collected on a Hitachi Co. S4800 field emission scanning electron microscope. A field emission transmission electron microscope (JEM-2100F) was used to collect high-resolution transmission electron microscopy (HRTEM) images and energy-dispersive X-ray spectroscopy (EDS) was carried out in STEM mode. Diffuse reflectance ultraviolet-visible (DR UV-vis) spectra were recorded on a Shimadzu UV-3600 spectrophotometer. X-ray photoelectron spectroscopy (XPS) was performed on an X-ray ESCALAB 250Xi spectrometer.

## Electrochemical and photoelectrochemical measurements

Electrochemical and photoelectrochemical tests were conducted with a typical three-electrode system, in which a platinum plate electrode and a saturated calomel electrode were used as the counter electrode and reference electrode, respectively. Phosphate buffer (0.2 M, pH=7) was used as the electrolyte. A 300 W Xe lamp with an AM 1.5 G filter (Perfect, PLS-SXE300C, China) was the light source and the light intensity reaching the reactor was 100 mW/cm<sup>2</sup>. Electrochemical and photoelectrochemical performance was tested by a Zahner IM6 electrochemical workstation. Electrochemical impedance spectra were recorded at 1.23 V vs. RHE with an amplitude of 10 mV from 0.01 Hz to 100 000 Hz. I-t curves were obtained at 1.23 V vs. RHE.

## Figures

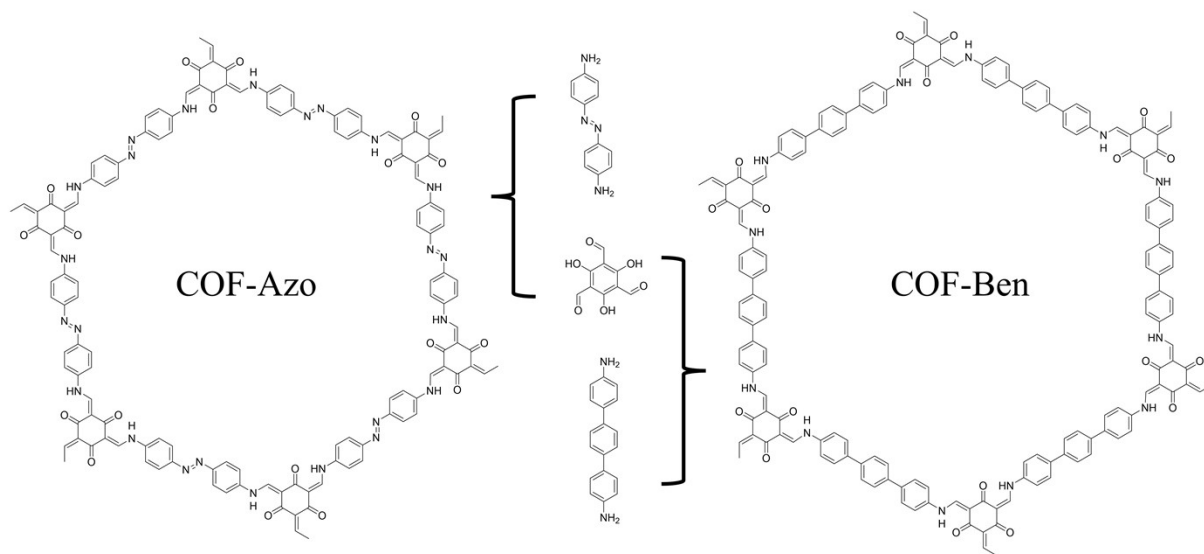

**Scheme. S1** Monomers and structures diagram of COF-Azo and COF-Ben

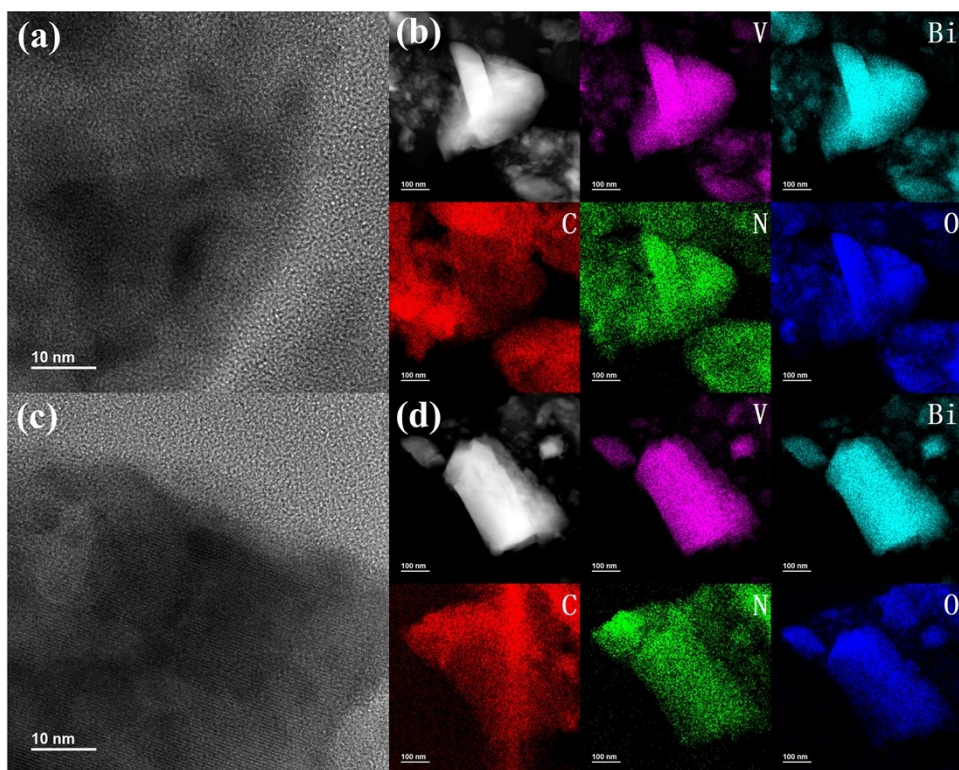

**Fig. S1** (a) HRTEM image and (b) element mapping of BiVO<sub>4</sub>/COF-Azo; (c) HRTEM image and (d) element mapping of BiVO<sub>4</sub>/COF-Ben

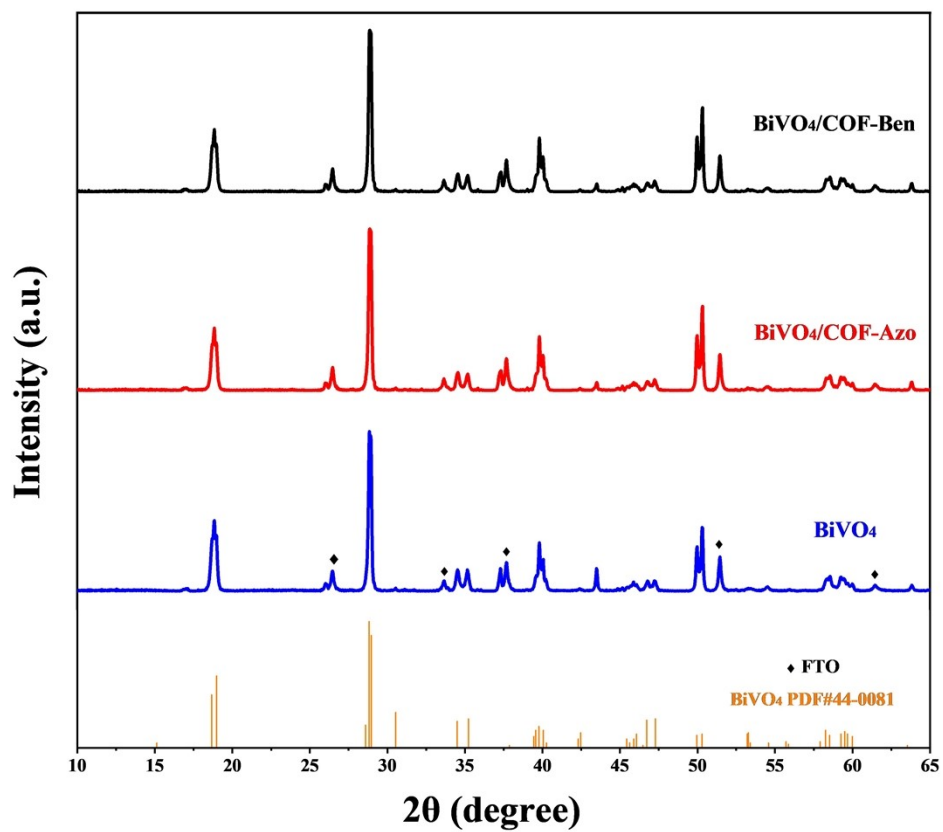

Fig. S2 XRD patterns of BiVO<sub>4</sub>, BiVO<sub>4</sub>/COF-Azo and BiVO<sub>4</sub>/COF-Ben

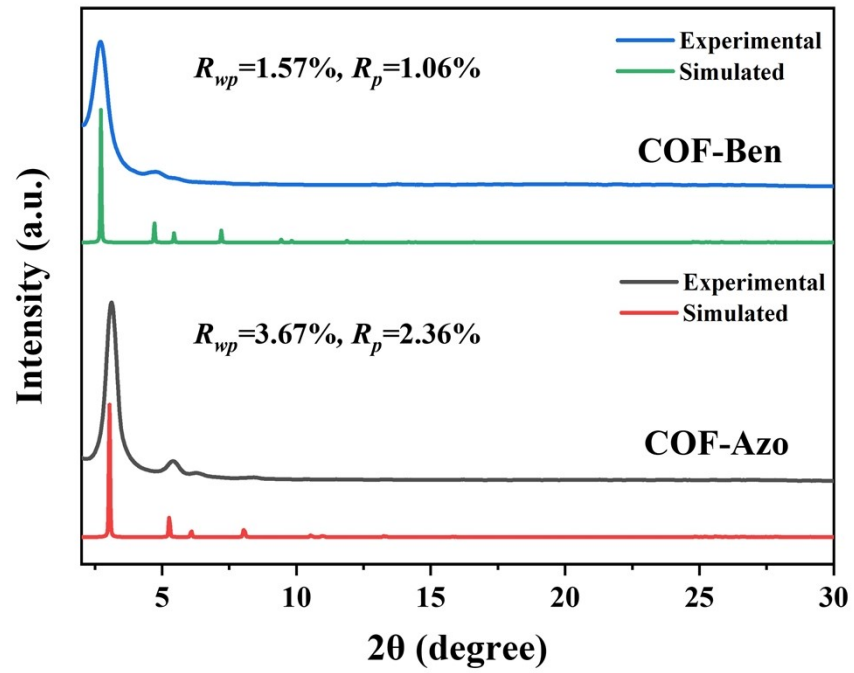

**Fig. S3** XRD patterns with experimental and simulated results of COF-Azo and COF-Ben

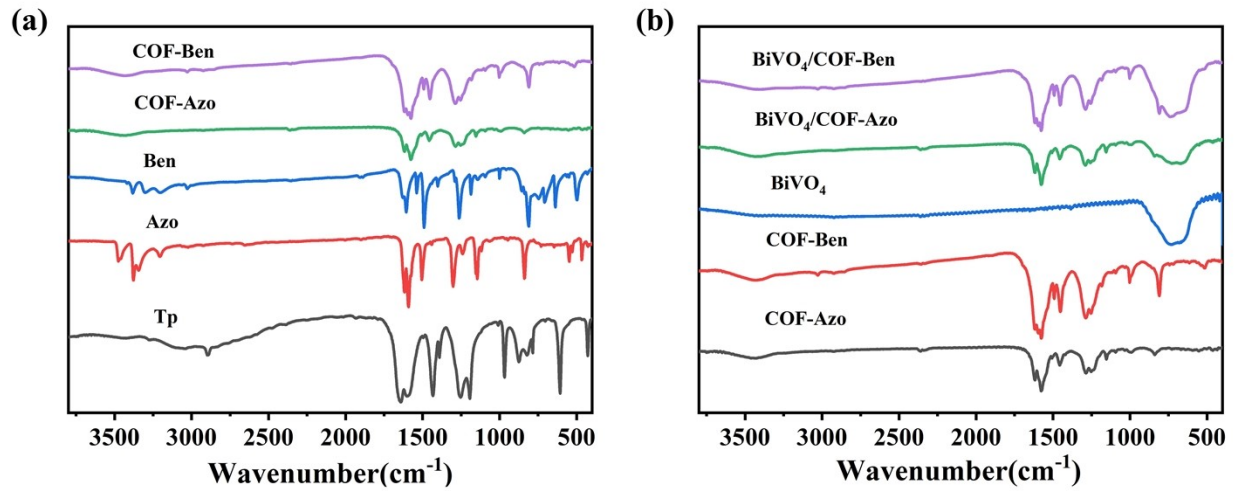

**Fig. S4** (a) FT-IR spectra of Tp, Azo, Ben, COF-Azo and COF-Ben; (b) FT-IR spectra of COF-Azo, COF-Ben,  $\text{BiVO}_4$ ,  $\text{BiVO}_4/\text{COF-Azo}$  and  $\text{BiVO}_4/\text{COF-Ben}$

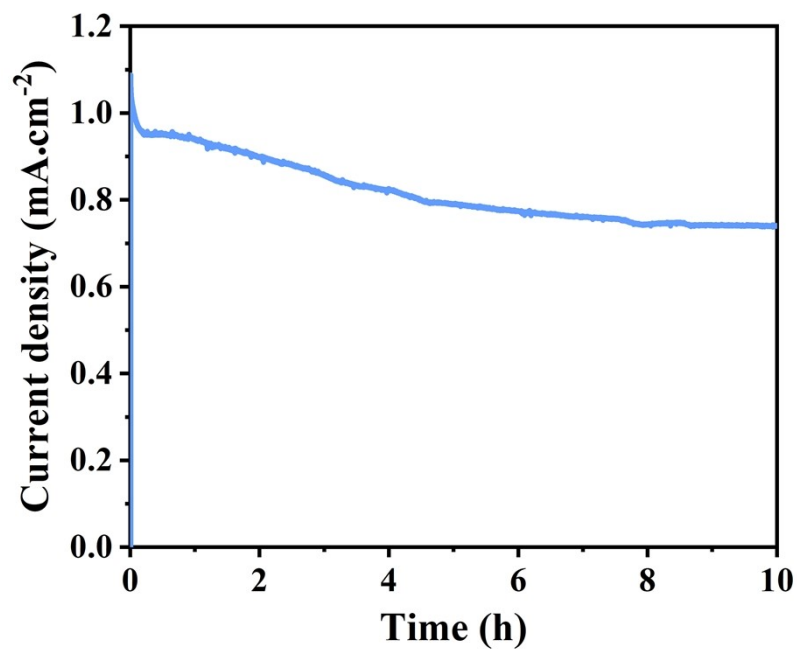

**Fig. S5** Stability test curve of BiVO<sub>4</sub>/COF-Azo photoanode

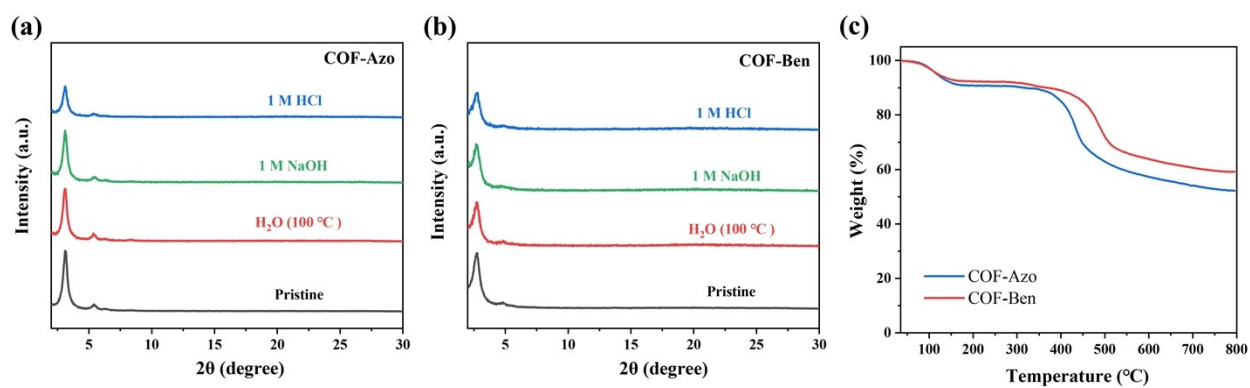

**Fig. S6** PXR patterns for (a) COF-Azo and (b) COF-Ben before and after treatment with water (100 °C), HCl (1 M), and NaOH (1 M), respectively. (c) TGA curves of COF-Azo and COF-Ben, respectively.
